# Supplementary material for: Ni/NiO@NC as a highly efficient and durable HER electrocatalyst derived from nickel(ii) complexes: importance of polydentate amino-acid ligands
Source: Royal Society of Chemistry journal article supplement (doi:10.1039/d3nr04768g), 2023-01-01
Supplement: d3nr04768g1.pdf [file d3nr04768g1.pdf]

## *Supporting Information*

# **Ni/NiO@NC as a high efficiency and durable HER electrocatalyst derivated from Nickel( II ) complexe: the importance of polydentate amino acid ligand**

**Xu Yang<sup>a,1</sup>, Mengxue Liu<sup>a,1</sup>, Fang Cui<sup>\*a</sup>, Qinghai Ma<sup>a</sup>, Tieyu Cui<sup>\*a</sup>**

*School of Chemistry and Chemical Engineering, Harbin Institute of Technology, Harbin, 150001, P.R. China.*

These authors contributed equally.

### **Corresponding Authors:**

Fang Cui, Tieyu Cui

Fax: (+86) 0451-86403646

Email: [cuifang@hit.edu.cn](mailto:cuifang@hit.edu.cn) (F. Cui), [cuit@hit.edu.cn](mailto:cuit@hit.edu.cn) (T. Y. Cui)

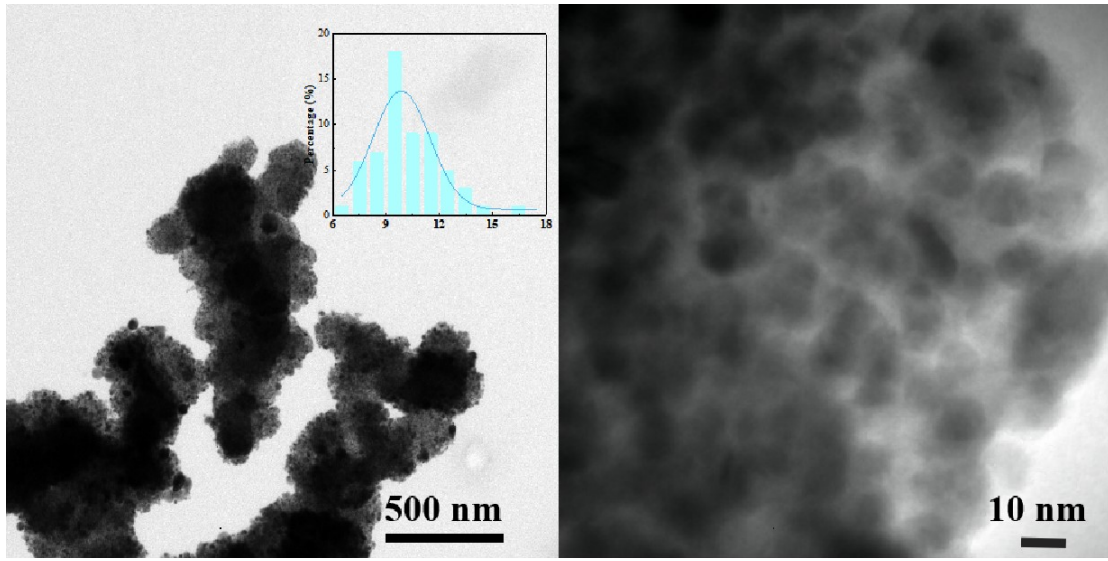

**Fig. S1 (a) TEM images of Ni/NiO/C-Acrylic acid**

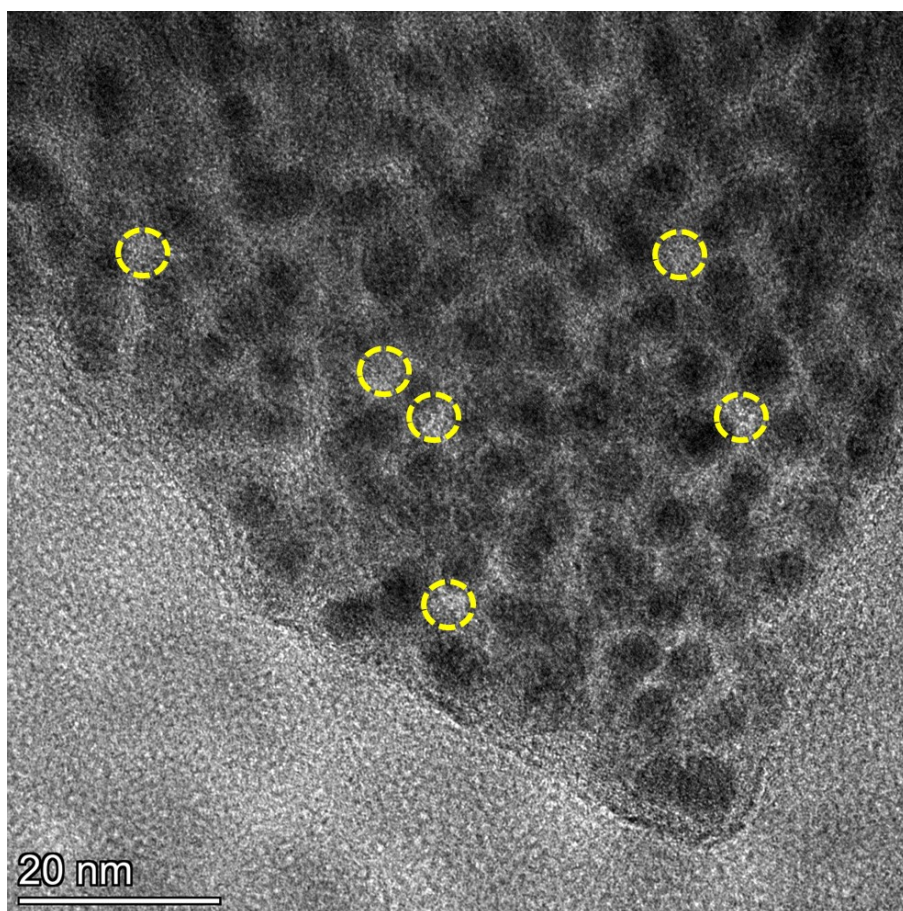

**Fig. S2 TEM image of Ni/NiO@NC-540 .**

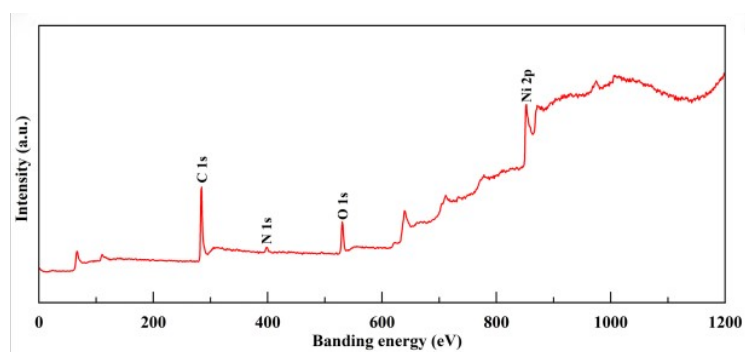

Fig. S3 The full scan of the XPS spectrum of Ni/NiO@NC-540

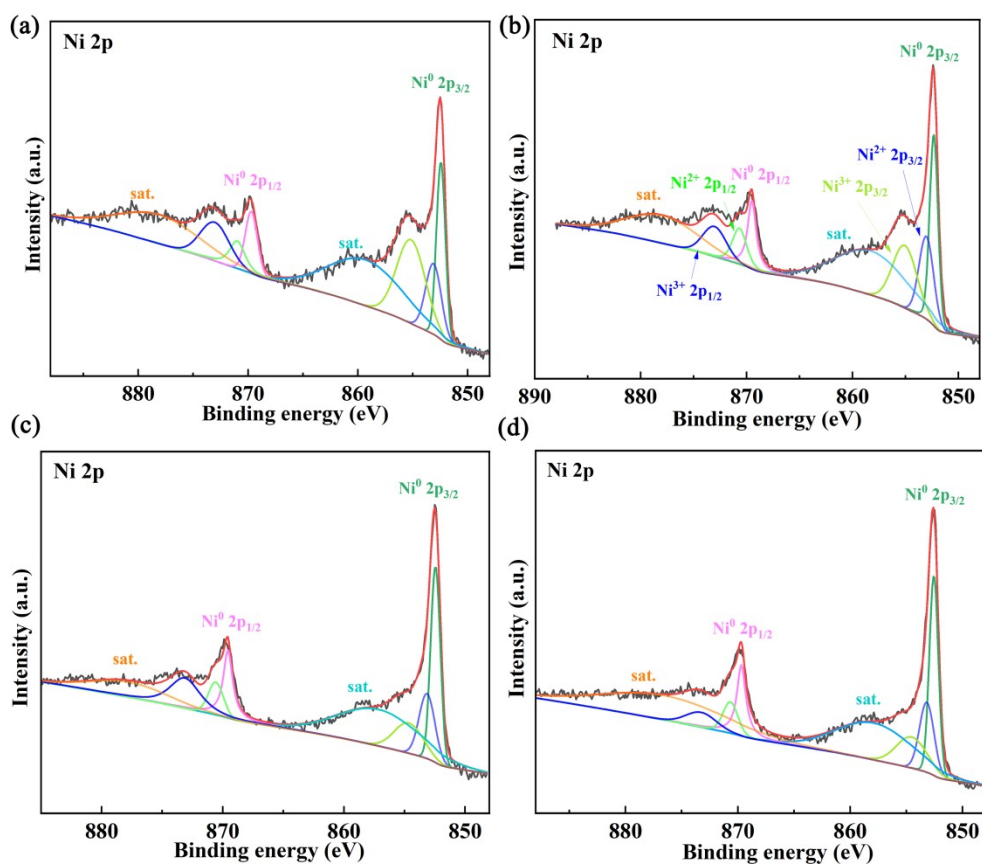

Fig. S4 The Ni 2p spectrum of Ni/NiO<sub>x</sub>@NC-AA-T : (a) 480°C, (b) 540°C, (c) 600°C, (d) 660°C.

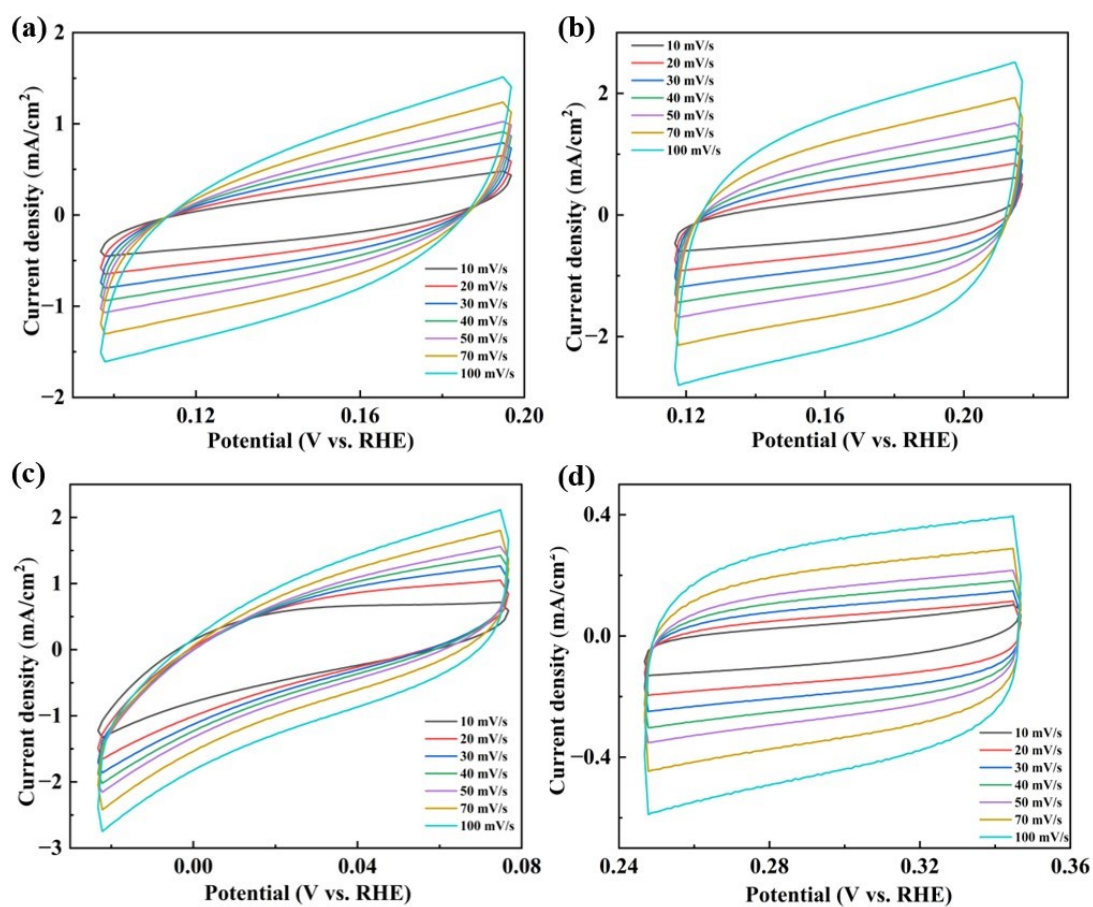

**Fig. S5** Cyclic voltammetric curves of Ni/NiO@NC-480(a), -540(b), -600(c) and -660(d) at different scan rates where no faradaic reactions occurred. at different scan rates where no faradaic reactions occurred.

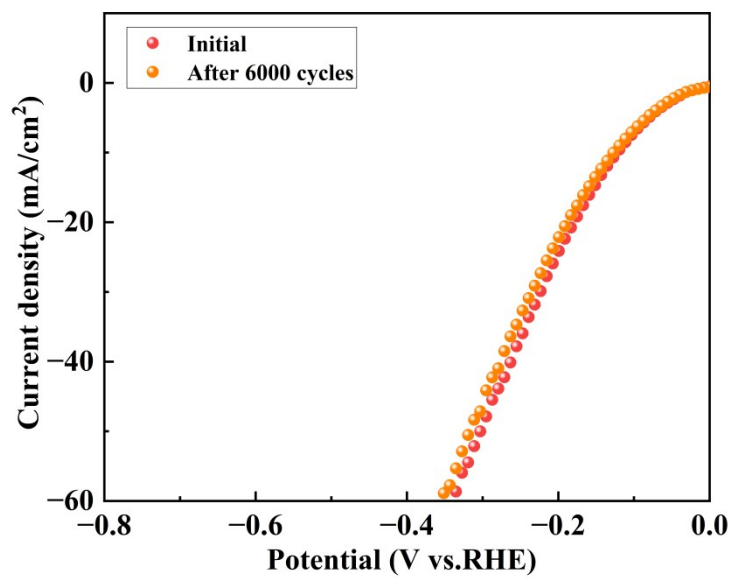

**Fig. S6 Polarization curves before and after 6000 CV cycles (-0.9 V ~ -1.4 V)**

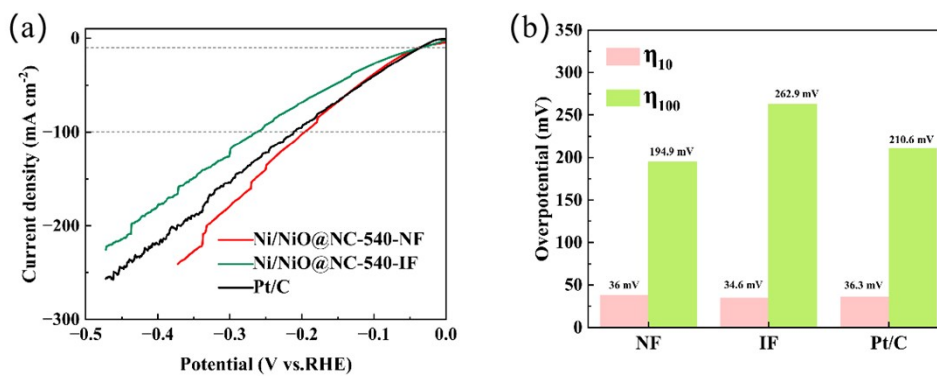

**Fig. S7 (a) LSVs of Ni/NiO@NC-540-NF, -IF and 20w% Pt/C for HER. (b) Overpotentials of different catalysts at current densities of 10 mA cm<sup>-2</sup> and 100 mA cm<sup>-2</sup>.**

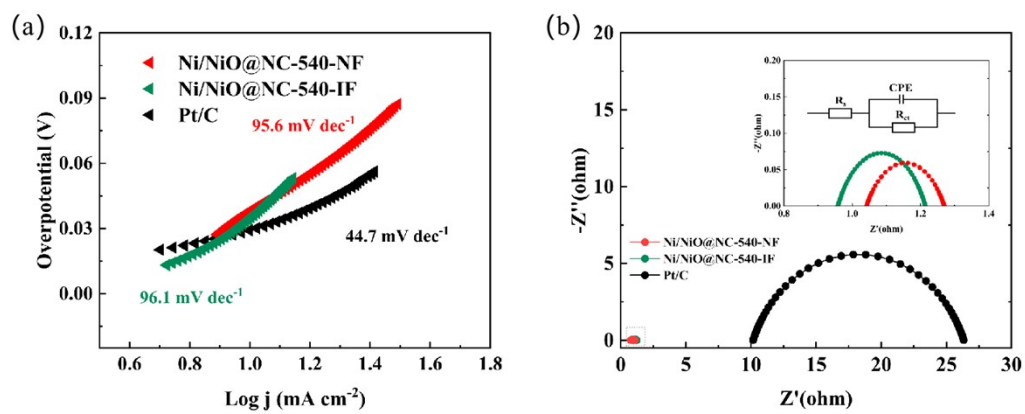

**Fig. S8 (a) The Tafel slope of Ni/NiO@NC-540-NF, -IF and 20w% Pt/C for HER. (b) The relevant EIS plot.**



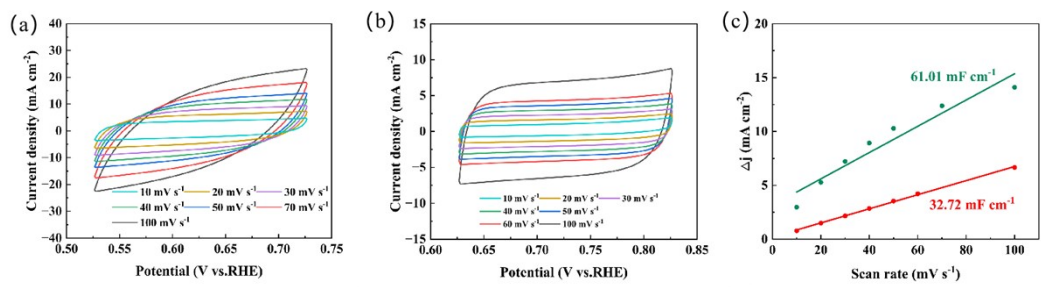

**Fig. S9** Cyclic voltametric curves of Ni/NiO@NC-540-IF(a) and -NF(b) at different scan rates where no faradaic reactions occurred. at different scan rates where no faradaic reactions occurred, the relevant Cdl plot (c).

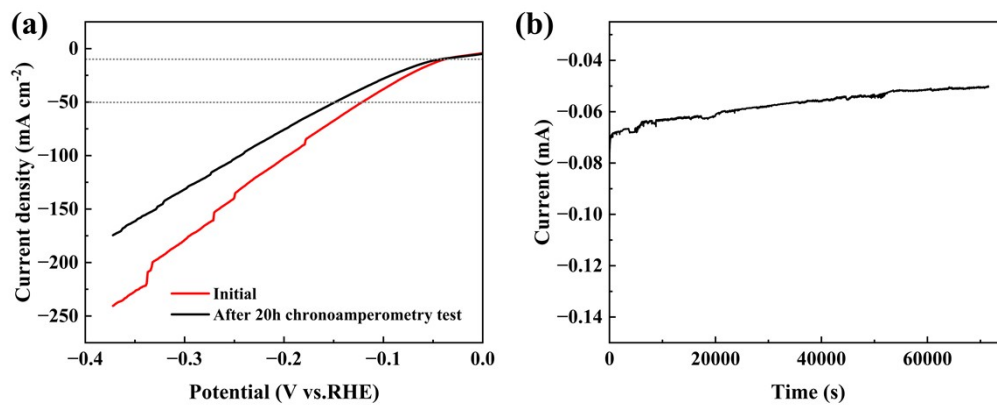

**Fig. S10 Polarization curves before and after 20 h chronoamperometry test(a), (b)Chronoamperometry test of Ni/NiO/C-500-NF (50 mV vs. RHE).**

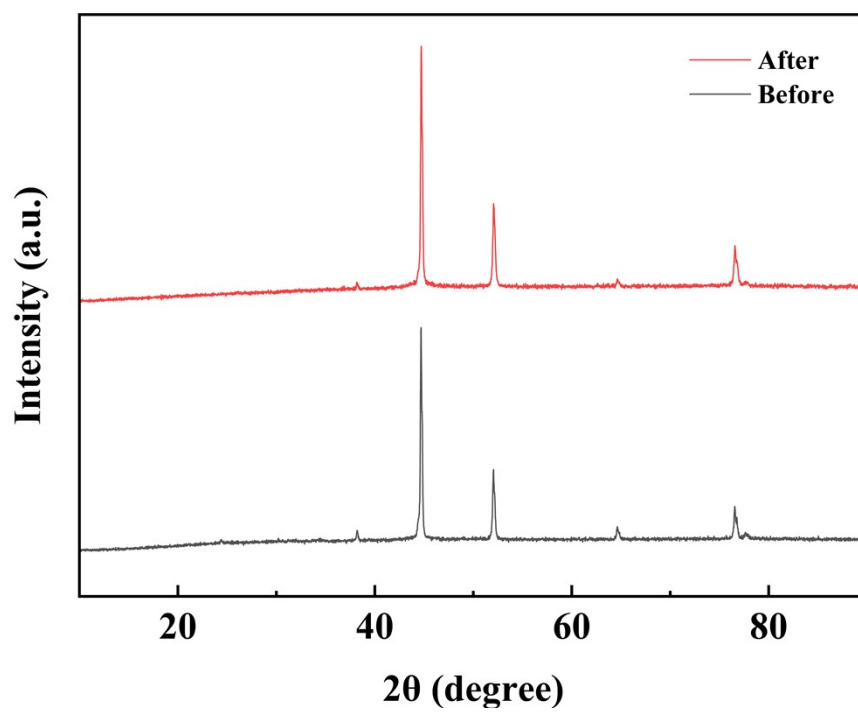

**Fig. S11 XRD plots before and after 20 h chronoamperometry test**

**Table. S1 Content ratio of Ni with different valence states in Ni/NiO<sub>x</sub>@NC-AA at different synthesis temperatures.**

| Catalysts                   | Ni <sup>0</sup> 2p <sub>3/2</sub> (%) | Ni <sup>2+</sup> 2p <sub>3/2</sub> (%) | Ni <sup>3+</sup> 2p <sub>3/2</sub> (%) | Ni <sup>0</sup> /(Ni <sup>2+</sup> +Ni <sup>3+</sup> ) |
|-----------------------------|---------------------------------------|----------------------------------------|----------------------------------------|--------------------------------------------------------|
| Ni/NiO <sub>x</sub> @NC-480 | 18.7                                  | 13.0                                   | 28.0                                   | 0.46                                                   |
| Ni/NiO <sub>x</sub> @NC-540 | 21.4                                  | 15.6                                   | 19.4                                   | 0.61                                                   |
| Ni/NiO <sub>x</sub> @NC-600 | 27.5                                  | 15.0                                   | 12.8                                   | 0.99                                                   |
| Ni/NiO <sub>x</sub> @NC-660 | 27.6                                  | 15.4                                   | 14.3                                   | 0.93                                                   |

**Table.S2. Overpotential comparison of Ni/NiO@NC-540 and Ni/NiO@NC-540-NF with state-of-the-art Ni-based HER catalysts.**

| <b>Catalyst</b>                                                           | <b><math>\eta@10\text{mA cm}^{-2}</math> [mV]</b> | <b>Reference</b> |
|---------------------------------------------------------------------------|---------------------------------------------------|------------------|
| Ni/NiO-NC                                                                 | 179 (1 M KOH)                                     | 1                |
| Sr-NiO                                                                    | 164 (4.24 M KOH)                                  | 2                |
| NiO <sub>x</sub> -AC-500                                                  | 180 (0.1 M KOH)                                   | 3                |
| Ni-NiO/Ti <sub>3</sub> C <sub>2</sub> T <sub>x</sub>                      | 72 (1 M KOH)                                      | 4                |
| Ni-NiO@3DHPG                                                              | 310 (1 M KOH)                                     | 5                |
| H-Ni/NiO/C                                                                | 87 (1 M KOH)                                      | 6                |
| CNO@NSG                                                                   | 109.6 (1 M KOH)                                   | 7                |
| CNN-500                                                                   | 127 (1 M KOH)                                     | 8                |
| CoP/P-NiO/NF                                                              | 52 (1 M KOH)                                      | 9                |
| Mo-NiCoP/NF                                                               | 64 (1M KOH)                                       | 10               |
| P-Ni/Mo-TEC@NF                                                            | 22 (1 M KOH)                                      | 11               |
| Ni <sub>2</sub> P/FeP-FF                                                  | 42 (1M KOH)                                       | 12               |
| CoS/Ni <sub>x</sub> P <sub>y</sub> /Fe-Ni <sub>3</sub> S <sub>2</sub> @NF | 49 (1 M KOH)                                      | 13               |
| NiWO <sub>4</sub> -Ni <sub>3</sub> S <sub>2</sub> @NiO/NF-3               | 89 (1 M KOH)                                      | 14               |
| Co <sub>2</sub> P- <i>x</i> /Ni <sub>2</sub> P- <i>y</i> @ NF             | 79 (1 M KOH)                                      | 15               |
| Ni/NiO <sub>x</sub> @NC-AA-540                                            | 100 (1 M KOH)                                     | This work        |
| Ni/NiO <sub>x</sub> @NC-AA-540-NF                                         | 36 (1 M KOH)                                      | This work        |

## References

1. Y. Liu, G. Mou, Y. Wang, F. He, N. Dong, Y. Lin, M. Zhong and B. Su, *ACS Applied Nano Materials*, 2022, **5**, 2953-2961.
2. X. Yi, X. He, F. Yin, G. Li and Z. Li, *Electrochim. Acta*, 2021, **391**, 138985.
3. V. C. Hoang, K. N. Dinh and V. G. Gomes, *Carbon*, 2020, **157**, 515-524.
4. B. Zhang, Z. Du, R. Sun, X. Lai, J. Lan, X. Liu and L. Yan, *ACS Appl. Mater. Interfaces*, 2022, **14**, 47529-47541.
5. N. Ullah, W. Zhao, X. Lu, C. J. Oluigbo, S. A. Shah, M. Zhang, J. Xie and Y. Xu, *Electrochim. Acta*, 2019, **298**, 163-171.
6. H. H. Do, M. A. Tekalgne, Le QV, J. H. Cho, S. H. Ahn and S. Y. Kim, *Nano Converg.*, 2023, **10**, 6.
7. H. Li, H. Fu, J. Yu, L. Wang, Y. Shi and L. Chen, *J. Alloy. Compd.*, 2022, **922**.
8. Y. Yan, Q. Ma, F. Cui, J. Zhang and T. Cui, *Electrochim. Acta*, 2022, **430**.
9. F. Nie, Z. Yang, X. Dai, Z. Ren, X. Yin, Y. Gan, B. Wu, Y. Cao, R. Cai and X. Zhang, *J. Colloid. Interface. Sci.*, 2022, **621**, 213-221.
10. Y. Zhao, J. Chen, S. Zhao, W. Zhou, R. Dai, X. Zhao, Z. Chen, T. Sun, H. Zhang and A. Chen, *J. Alloy. Compd.*, 2022, **918**.
11. P. Zuo, X. Ji, J. Lu, Y. Chai, W. Jiao and R. Wang, *J. Colloid. Interface. Sci.*, 2023, **645**, 895-905.
12. M. Jiang, H. Zhai, L. Chen, L. Mei, P. Tan, K. Yang and J. Pan, *Adv. Funct. Mater.*, 2023.
13. Z. Wang, B. Li, L. Wang, L. Chu, M. Yang and G. Wang, *Electrochim. Acta*, 2023, **462**, 142767.
14. R. Shi, J. Yang and G. Zhou, *Chem. Eng. J.*, 2023, **457**.
15. H. Zhao, J. Liang and Y. Zhao, *J. Alloy. Compd.*, 2022, **907**.
